# Supplementary material
Source: PubMed Central journal article supplement (PMC2756862)
Supplement: EC.00183-09_1.pdf [file EC.00183-09_1.pdf]

Tco57 ----RIVvcrIQNmeEdKrKqQ0leKtgh----STLNaLMQaigAIRaK-----E-----ttSVFIDYvhtFDSVD--dgcVlkaVvppgVepgVlvacVvrF--Le  
Tco51 eswrgffglRlIpsIevdKrQ0LqEq-tgh----STLNaLMQVmgAVraK-----K-----ttSaFIDYvhtFDfVd--dgcVpkaVvppgVepgVlvarVvcF--Le  
Tco80 ----KIVALkIPntVKdRrQ0Q0AefKtrr----STLDSLMQVmgSMgQR-----KsgkK----tiIFIDHtRtFDyVg--HsyVvkapvglgVgpgLvacVasL--pe  
Tco1 ----QMMLtKngyVrpgLxPQ0SgkKstc----STVDaavQLfGAVgyg----sksgK----tAtlMNYAl--FDSVD--HdgIttaLalkyrg--lLtrwXrpx--Lp  
Tco38 ----QMMLtKngyVrpgLxPQ0SgkKstc----STVDaavQLfGAVgyg----sksgK----tvAtlMNYAR--FDSVD--HdgIttaLalkyrg--lLtrwXrpx--Lp  
Tco83 ----QMMARtngyVrpgLxPQ0SgFtstc----STVDaavQLfSvSgyg----nkkRk----tvAVYItYahgFDfAd--YdgIttaLalkyrg--lLtrwXrpx--Lp  
Tco135 ----RMVArRtngyVrpgLxPQ0SgkKstc----STVDaavQLfSvSgyg----skrgK----kiAtvMNYAReiDSVD--qddVttaLgxsiedlLtrwMrwl--Ls  
Tco112 ----QMMARtngyVrpgLxPQ0SgFkStc----STVDaavQLfSvSgyg----skkrK----tiAVYItYahgFDfAd--YscVttaLalkyrg--lLtrwMrwl--Ls  
Tco84 ----QMMaQ---gvmMnaKppmQ0SgFkAr---SaVdaVvQLIiivSgyg----sksgK---gatvavIggShkFDpID--HdgIVtaLsrimsd--lLtrw--mr--pl  
Tco105 ----QMMaQ---gvmMnaKppmQ0SgFkAr---SaVdaVvQLIiivSgyg----sksgK---gatvavIggShkFDpID--HdgIVtaLsrimsd--lLtrw--mr--pl  
Tco79 ----QMMaQ---gvmMnaKppmQ0SgFkAr---SaVdaVvQLIiivSgyg----sksgK---gatvavIggShhFDSVD--HdgIVtaLltyhgf--yfnkmdemt--av  
Tco8 ----RMMArgLmNyeDqRlySRQwgFestp----fTaDasIQLvgAVrhe-----gkrgK----piSalVDYAhTfGsvD--HhgVttaLsxrsVnsLtkwVgxl--fs  
Tco41 ----LMVArg--llaawissvPQ--SgFKstr----SiVdatVQIvIvSgyg----skkrK----tiAVYItYahgFDfAd--YscVttaLvnvtrt--fnnememF--Ls  
Tco97 ----LMVArg--llaawissvPQ--SgFKstr----SiVdatVQIvIvSgyg----skkrK----tiAVYItYahgFDfAd--YscVttaLvnvtrt--fnnememF--Ls  
Tco34 ----LMVArg--llaawinsvPQwSgFKstr----SiVdatVQIvIvSgyg----skkrK----tiAVYItYahgFDfAd--YscVttaLvnvtrt--fnnememi--fi  
Tco19 ----LMVard--cwprrltavdaQxaYKftr----SvVdaVvQLvsvSya-----nrknKg--givaAtFIyctRtFgsva--YscIittLixhne---dppLtsW--Mg  
Tco43 ----paIA---glvnrmeEQlQRSGFRptl----pSID-hfsVs-tVsyg----nekqn---neAtFIDcvhgFDlVdHdHscPitaLg--siedlPttwrr--F--Ls  
Tco149 ----paIAx---glvnrmeEQlQRSGFRptl----pSIDsLsVs-tVsyg----nekqn---neAtFIDcvhgFDlVdHdHscPitaLg--siedlPttwrr--F--Ls  
Thingi ----RIIAARLrdtVesQLtPQ0SgFRpcc----STLEqLhVraALCRp-----thqsrT---gAVFVDYeKAFDfVD--HdkIareMhrmkVshpIvkwcvf--Ls  
ThIX.146b ----RIIAARLrdtVesQLaPQ0SgFRpcc----STLEqLhVraALCRp-----thqsrT---gAVFVDHAKAFNTVD--HdkIareMhrmkVshpIvkwcvf--Ls  
Tc507229 ----RIRaarsRgVesQLsPQppglRpn-----SSLQdLhLraAMhcn-----apqhrT---aAVFVGHahAFETVN--HnkIVleMrrlsannhIv-----F--Ls  
Tc510783 ----RILvaRIRdVIdpQLtPQRSGlXpnd----STLDqLhLraAMhcn-----apqhrT---atdlVgHAnAFDfVD--HenIILkIrrlsIpnhIvwsaef--Ls  
Tc503559 ----RtpAaRIRdVIESQLaLQpScFlpgn----STpDqLhLraAMhcn-----apehrT---aAVFVDYAnAFgTVg--pdaVIlEMrrlsIpnrIarwsac--Ln  
Tc511541 ----RtpAaRVRNvIESQstlQpScFlpgn----SapDqLhLsaAMr-----pqhrT---aAVFVDHAdAFgTVg--pdaVIlEMrrlsIpnrIarwsac--Ln  
TbI.1 ----KIVcaRIRntVesKlKvQ0SgFstgn----STLDqLhLmaALCRp-----hhddRk---gAVFayYeAFDfVD--HataVraMqemgIptytkwtatl--Lq  
Lm11a ----IIsrRLhdhLrdpLQ0PQ0S--vfrphrs-tAdpVr---LlLhkaVRR-----RpgiK---trAVsMDYARTFDALD--H--HttfIatrkkfkapdrLtrwMrwl--Ls  
Lm30a ----rmVRDLfLrdpLQ0PQ0S--dlrphrs-tAaplpqgsLhrrsaa-----ltghGq---mrSagclARALGSVD--HgaLtaLkrgfVdplLtrwMrwl--sd  
Lm19c ----skLRkRLdEeRppataA--gfpssrIhavglp---lphnaaRr-----QqgtK---taAViVgHARTpDSDVD--Hgt-----LrfrndVphttrImas--La  
Lm33b ----rxLRdHvEdKlPQ0S--RfrpqcrcrVapntn---lplrSaARR-----OpgAR---igaALVdnArtlGsvG--Hg-----aeevqrvvptrrImnF--Vd  
Lm35d ----tIsrRVRdHegRlQ0PQ0S--gfh---phcStr---nlPglaparsn---papVyrdrsrSagclSRAFDSap--Hgseeaqrsvatyslhhg-----F--Lr  
Lbr6a ----IIsrRLdHvEdKlPQ0S--gfp---lhcFTfxtPlrIaphds-----ataaRqrersAgppHARAFg--fd---HttfIatrkkfkapdrLtrwMrwl--Ls  
Lbr11a ----VIsrRLcdsVedRlQ0P0xS--gfp---shRSTVdPldlphrVgQR---Rvgl---eigAMFVDHtCAFDSpD--rgaaItvLkrgnpeprytrrVtdF--Vg  
Lbr11b ----VIsrRLcdsVedRlQ0P0xS--gfp---shRSTVdPldlphrVgQR---Rvgl---eigAMFVDHtCAFDSpD--rgaaItvLkrgnpeprytrrVtdF--Vg  
Lbr11c ----VIqxrCDcaEsQfQa11i--sfh---shraCLD--ywVcfSkKQp---gasp---rprSgilaYahkFhSLD--HriIttvLrefkadhLtrwMrwl--Vd  
Lbr34d ----MVsRRLdHvEdKlPQ0S--sfr---srnpTIdpLdLhrVvCq---Opgt---eieeCFMDctSALDlVD--rggVtaLkksIghslLrImyF--sag  
Lm20a ----MVsRRLdHvEdKlPQ0S--sfr---srnpTIdpLdLhrVvCq---Opgt---eieeCFMDctSALDlVD--rggVtaLkksIghslLrImyF--sag  
Lm29a ----MVsRRLdHvEdKlPQ0S--sfr---srnpTIdpLdLhrVvCq---Opgt---eieeCFMDctSALDlVD--rggVtaLkksIghslLrImyF--sag  
Lm29a ----MVsRRLdHvEdKlPQ0S--sfr---srnpTIdpLdLhrVvCq---Opgt---eieeCFMDctSALDlVD--rggVtaLkksIghslLrImyF--sag  
LITc ----MVsRRLdHvEdKlPQ0S--sfr---srnpTIdpLdLhrVvCq---Opgt---eieeCFMDctSALDlVD--rggVtaLkksIghslLrImyF--sag  
mvlkRLlwwtphphQyayRsmRtTtmqlahlIhevehRnnyhfVqSLPKKsgignQlVhRphrtlVlVDFSKAFDSIDh---rVLSrLlanipgvncrrLrnF--Lc  
LITco ----mvlkRLlwwtphphQyayRsmRtTtmqlahlIhevehRnnyhfVqSLPKKsgignQlVhRphrtlVlVDFSKAFDSIDh---rVLSrLlanipgvncrrLrnF--Lc  
Tco110 ----ailrQfLrvwVlRthrymcEsihvttvqmtphidsiehdreyfrcSVpsRsgisaQpPhhfvtVlVDFGRALDfDfDf---yVIsVtVpvrVfgyldyktLcni---Lc  
Tco116 ----ailrQfLrvwVlRthrymcEsihvttvqmtphidsiehdreyfrcSVpsRsgisaQpPhhfvtVlVDFGRALDfDfDf---yVIsVtVpvrVfgyldyktLcni---Lc  
Lbr23a ----ttlaRlfhaRqphlCcxahgrgxAtkmvlrsritatveMhrnIhyhvmIqKRpgrgQathRairtlitvVlFRKAFDNMDS---pILakrpgsfpctrLkhwLrnF--La  
Lbr27i ----mtlaRlfhaRqphlCcxahgrgxAtkmvlrsritatveMhrnIhyhvmIqKRpgrgQathRairtlitvVlFRKAFDNMDS---pILakrpgsfpctrLkhwLrnF--La  
Lbr8a ----malmeLfhaQqshlRQahagrdyAtkivlrsritatveMhrnIhyhvmIqKRpgrgQathRairtlitvVlFRKAFDNMDS---pILakrpgsfpctrLkhwLrnF--La  
Lbr10a ----malteLfhaQqshlRQahagrdyAtkivlrsritatveMhrnIhyhvmIqKRpgrgQathRairtlitvVlFRKAFDNMDS---pILakrpgsfpctrLkhwLrnF--La  
Lbr14a ----malteLfhaQqshlRQahagrdyAtkivlrsritatveMhrnIhyhvmIqKRpgrgQathRairtlitvVlFRKAFDNMDS---pILakrpgsfpctrLkhwLrnF--La  
Lbr23c ----malteLfhaQqshlRQahagrdyAtkivlrsritatveMhrnIhyhvmIqKRpgrgQathRairtlitvVlFRKAFDNMDS---pILakrpgsfpctrLkhwLrnF--La  
Lbr3a ----malteLfhaRq1hlRQahagrdyAtkivlrsritatveMhrnIhyhvmIqKRpgrgQathRairtlitvVlFRKAFDNMDS---pILakrpgsfpctrLkhwLrnF--La  
Lbr33b ----malteLfhaRq1hlRQahagrdyAtkivlrsritatveMhrnIhyhvmIqKRpgrgQathRairtlitvVlFRKAFDNMDS---pILakrpgsfpctrLkhwLrnF--La  
Lbr5a ----malmeLfhaRq1hlRQahagrdyAtkivlrsritatveMhrnIhyhvmIqKRpgrgQathRairtlitvVlFRKAFDNMDS---pILakrpgsfpctrLkhwLrnF--La  
Lbr13b ----malteLfhaRq1hlRQahagrdyAtkivlrsritatveMhrnIhyhvmIqKRpgrgQathRairtlitvVlFRKAFDNMDS---pILakrpgsfpctrLkhwLrnF--La  
Lbr22d ----malteLfhaRq1hlRQahagrdyAtkivlrsritatveMhrnIhyhvmIqKRpgrgQathRairtlitvVlFRKAFDNMDS---pILakrpgsfpctrLkhwLrnF--La  
Lbr35d ----malteLfhaRq1hlRQahagrdyAtkivlrsritatveMhrnIhyhvmIqKRpgrgQathRairtlitvVlFRKAFDNMDS---pILakrpgsfpctrLkhwLrnF--La  
Lbr31g ----malteLfhaRq1hlRQahagrdyAtkivlrsritatveMhrnIhyhvmIqKRpgrgQathRairtlitvVlFRKAFDNMDS---pILakrpgsfpctrLkhwLrnF--La  
Lbr19g ----ttlaRlfhaRrprlRQahagrdyAtkivlrsritatveMhrnIhyhvmIqKRpgrgQathRairtlitvVlFRKAFDNMDS---pILakrpgsfpctrLkhwLrnF--La  
Tc511099 ----mihRRLSAlpPhhrQfRfIcnsafyvgggtcyrqITrglnefgiveRpggdaptrrRhr--svlVlIDFpTAFDfDfDh--gklfcmldrLpLglskwrLqny--Lr  
Tc510933 ----mihRRLSAlpPhhrQfRfIcnsafyvgggtcyrqITrglnefgiveRpggdaptrrRhr--svlVlIDFpTAFDfDfDh--gklfcmldrLpLglskwrLqny--Lr  
Tc511603a ----mihRRLSAlpPhhrQfRfIcnsafyvgggtcyrqITrglnefgiveRpggdaptrrRhr--svlVlIDFpTAFDfDfDh--gklfcmldrLpLglskwrLqny--Lr  
Tc506939 ----mihRRLSAlpPhhrQfRfIcnsafyvgggtcyrqITrglnefgiveRpggdaptrrRhr--svlVlIDFpTAFDfDfDh--gklfcmldrLpLglskwrLqny--Lr  
Tc507065a ----mihRRLSAlpPhhrQfRfIcnsafyvgggtcyrqITrglnefgiveRpggdaptrrRhr--svlVlIDFpTAFDfDfDh--gklfcmldrLpLglskwrLqny--Lr  
Tc507069 ----mihRRLSAlpPhhrQfRfIcnsafyvgggtcyrqITrglnefgiveRpggdaptrrRhr--svlVlIDFpTAFDfDfDh--gklfcmldrLpLglskwrLqny--Lr  
Tc503849a ----lvhrR-----rhrslAVRgisiAFDfDfDd--gqVlavldg1pLrLgrrptlvarsp--ar  
Tc510693 ----lvhrR-----rhrslAVRgisiAFDfDfDd--gqVlavldg1pLrLgrrptlvarsp--ar  
Tc510693 ----lvhrR-----rhrslAVRgisiAFDfDfDd--gqVlavldg1pLrLgrrptlvarsp--ar  
Tc508139 ----lvhrRLSAlpPhhrQfRfIcnsafyvgggtcyrqITrglnefgiveRpggdaptrrRhr--svlVlIDFpTAFDfDfDh--gklfcmldrLpLglskwrLqny--Lr  
Tc506309 ----lvhrRLSAlpPhhrQfRfIcnsafyvgggtcyrqITrglnefgiveRpggdaptrrRhr--svlVlIDFpTAFDfDfDh--gklfcmldrLpLglskwrLqny--Lr  
Tc510213 ----lvhsRLxvKwhExg-----tsvnvagassraapspslS--rspdRhldcdrhrgrwasvralrapagpssrptlvanhLr  
Consensus XXXXRIVAXRVRDXVEXXLLQ0PQ0SgFRpccXXXXXXXXXXSTLdXLMQVXXAVXQ0RXXXXXXVAVFIDYARAFDSVDXXXXXXIIXLXXXXXXVXXLXXXXXXFXXLX

230 240 250 260 270 280 290 300 310 320 330  
Consensus  
TART-A XRXAQVRVNXXXXXXXXXXXSTLXGVPQGSVLGPlXlXXIXXDSKSLXNlXXX--XLQHGFADDLTIVXXXXXXIXQXXQXXLXXIXSWSKEXXMEVSAEK  
nrtfEVkdqag-----eSragqIgaGVpQGSnLGPiLysIfsaDmpLhnyhpsptermIstYADDTiVLSsdilataaRn--EnyLkttfSWSKdVsvNNAK  
gRkfsVtaDgc-----rSs-vkfIeaGVpQGSVLGPlYsIfsaDmpNqnavtgaEveIiatYADDTiVlTktstciveatda-lQeyLdafgeWAVkwnVsINAgK  
eRsfavfIkg-----qfSEikVkfGVpQGSVLGPlYsIfsaDmpNqnavtgaEveIiatYADDTiVlTktstciveatda-lQeyLdafgeWAVkwnVsINAgK  
Tad1 gRtgsLffDd-----eSrypaITaGVpQGSVLGPlYsIfsaDmpNqnavtgaEveIiatYADDTiVlTktstciveatda-lQeyLdafgeWAVkwnVsINAgK  
SART1 gR-----aVvfer-----rgwghkaVScGVpQGSVLGPlLwdVgfdwvLrganl-----gQVvicYADDTiVtargDvrsasil-aaaVatVvArIRKlGLEVA1hK  
RT1 nR-----ELvfets-----dgpvtrsITaGVpQGSVLGPlLwntmydgvLdvaLpq-----dcEmvaYADDTiVlLipgIdvnaVKaa-eAeaVasVshWmaQhLQlIAPe  
gR--RavIrs-----sgTvevpVTrGcPQGSILGPlLwntmydgvLdvaLpq-----dcEmvaYADDTiVlLipgIdvnaVKaa-eAeaVasVshWmaQhLQlIAPe  
R1 cR--tVeaSlg-----tLctrfVSRGtPQGSVLGPlLwntmydgvLdvaLpq-----dcEmvaYADDTiVlLipgIdvnaVKaa-eAeaVasVshWmaQhLQlIAPe  
TRIM cR--tVtsSmg-----ssTqrsYvrGtPQGSVLGPlLwntmydgvLdvaLpq-----dcEmvaYADDTiVlLipgIdvnaVKaa-eAeaVasVshWmaQhLQlIAPe  
Bilbo sR--QVtaSvh-----dsTvtvltTkGcPQGSVLGPlLwntmydgvLdvaLpq-----dcEmvaYADDTiVlLipgIdvnaVKaa-eAeaVasVshWmaQhLQlIAPe  
LOA eReAQVRVr-----naSEdigfTcdVPhGpVLG--p11taavDLSLgrLncip--rLQHGFfAEaLTIvctspDlraIqha-iQggLgcITgWsaEkMrVSAEK  
Tv02516 gRtVQVRVN-----nylvEdvgLTCGVpQGSVLGPlLwntmydgvLdvaLpq-----dcEmvaYADDTiVlLipgIdvnaVKaa-eAeaVasVshWmaQhLQlIAPe  
Tv04672 gRSaQVRVd-----ntlSedmLarGVcxaSVLGP--n11VvpaDSTLEqLdrtp--gkaltarntvGdhaVrsatqRkQ--gsgcITnWparcstEVSAAK  
Tvs05203 eRtLEVRVN-----salSedngLacGPRGSVVGp--ppfIataySMNEALncil---vXkNwfvFVDDLaIvresagRkIQD--iRXLgDcatNwsaEdhVEaStKK  
TbV.204c gRtARVgaS-----nmlSEnihLTCwVpQGSVLGPlLwntmydgvLdvaLpq-----dcEmvaYADDTiVlLipgIdvnaVKaa-eAeaVasVshWmaQhLQlIAPe  
TbIX.146a crtAQVRVv-----naSEntqLTCGVHqGSvXG1--LlfiVtVDSLskwLncip--gQVrfFADDLTIVcassDlnaIQrt--vkgLdcVtNwsaEcyMEVSAEK  
Tcoing1 gRtAQVRVr-----ntlSEdisLTCGVpQGSVLGPlLwntmydgvLdvaLpq-----dcEmvaYADDTiVlLipgIdvnaVKaa-eAeaVasVshWmaQhLQlIAPe  
Tco93 gRtAQVRVN-----ntlSedisLTCGVpQGSVLGPlLwntmydgvLdvaLpq-----dcEmvaYADDTiVlLipgIdvnaVKaa-eAeaVasVshWmaQhLQlIAPe  
Tco92 gRtAQVRVN-----ntlSedisLTCGVpQGSVLGPlLwntmydgvLdvaLpq-----dcEmvaYADDTiVlLipgIdvnaVKaa-eAeaVasVshWmaQhLQlIAPe  
Tco54 g1tAQVRVN-----ntlSEdisLTCGVpQGSVLGPlLwntmydgvLdvaLpq-----dcEmvaYADDTiVlLipgIdvnaVKaa-eAeaVasVshWmaQhLQlIAPe  
Tco59 g1tAQVRVN-----ntlSEdisLTCGVpQGSVLGPlLwntmydgvLdvaLpq-----dcEmvaYADDTiVlLipgIdvnaVKaa-eAeaVasVshWmaQhLQlIAPe  
Tco46 gctAQVRVN-----ntlSEdisLTCGVpQGSVLGPlLwntmydgvLdvaLpq-----dcEmvaYADDTiVlLipgIdvnaVKaa-eAeaVasVshWmaQhLQlIAPe  
Tco3 gRtAQVRVN-----ntlSEdisLTCGVpQGSVLGPlLwntmydgvLdvaLpq-----dcEmvaYADDTiVlLipgIdvnaVKaa-eAeaVasVshWmaQhLQlIAPe  
Tco166 gRtVQMKN-----ntlSEdisLTCGVpQGSVLGPlLwntmydgvLdvaLpq-----dcEmvaYADDTiVlLipgIdvnaVKaa-eAeaVasVshWmaQhLQlIAPe  
Tv03401 gRtAQVRVN-----smLEsvglTrGfPQGSVLGPlLwntmydgvLdvaLpq-----dcEmvaYADDTiVlLipgIdvnaVKaa-eAeaVasVshWmaQhLQlIAPe  
Tvingi gRtAQVRVN-----v1SEdisLTCGVpQGSVLGPlLwntmydgvLdvaLpq-----dcEmvaYADDTiVlLipgIdvnaVKaa-eAeaVasVshWmaQhLQlIAPe  
Tco4 xwxAQIRIN-----nmkSEdieMmCvPQGSVLGPlLwntmydgvLdvaLpq-----dcEmvaYADDTiVlLipgIdvnaVKaa-eAeaVasVshWmaQhLQlIAPe  
Tco65 -ltaQIRIN-----nmk-EdieMmCvPQGSVLGPlLwntmydgvLdvaLpq-----dcEmvaYADDTiVlLipgIdvnaVKaa-eAeaVasVshWmaQhLQlIAPe  
Tco63 gRtAQVRVS-----s1kSEdieMmCvPQGSVLGPlLwntmydgvLdvaLpq-----dcEmvaYADDTiVlLipgIdvnaVKaa-eAeaVasVshWmaQhLQlIAPe

Tco098 grKAQVRVS-----sikSEdieMmcGVPQsSVLGPLlllnavvDLSLKRlDeiq---gLMHgfFgDDLTIicmhaklleIQET--tEkgMdcItSWSEEqfMEAsAER  
Tco11 grKAQVRVS-----sikSEdieMmcGVPQsSVLGPLlllnavvDLSLKRlDeiq---gLMHgfFgDDLTIicmhaklleIQET--tEkgMdcItSWSEEqfMEAsAER  
Tco45 grTAQVRVS-----sikSEdieMmcGVPQsSVLGPLlllnavvDLSLKRlDeiq---gLMHgfFgDDLTIicmhaklleIQET--tEkgMdcItSWSEEqfMEAsAER  
Tco56 grAgQVRVS-----sikSEdtqITcGVpQGSVLGPLlllnavvDLSLKRlDeiq---gLMHgfFgDDLTIicmhaklleIQEa--tEkgMdcItSWSEEqfMEAsAER  
Tco66 grtQVRVS-----rkmSEdtqMTcVp-----gymrrfpADDLTIicthtllpeIQEa--tEkgMdcItSWSEEqfMEAsAER  
Tco29 grTAxVRIS-----sikTEdtqITcGVpQGSVLGPLlllnavvDLSLKRlDeiq---gLMHgfFgDDLTIicmhaklleIQET--tEkgMdcItSWSEEqfMEAsAER  
Tco94 grTA-VRIN-----gikTEdtqITcGVpQGSVLGPLlllnavvDLSLKRlDeiq---gLMHgfFgDDLTIicmhaklleIQET--tEkgMdcItSWSEEqfMEAsAER  
Tco21 grtVQVRVr-----sikSEgtqMTcGVpQsSVLGPLlllnavvDLSLKRlDeiq---gMysfFADDLTIicmhaklleIQET--tEkgMdcItSWSEEqfMEAsAER  
Tco114 grTAQVRVg-----sikSEgtqMTcGVpQsSVLGPLlllnavvDLSLKRlDeiq---gMysfFADDLTIicmhaklleIQET--tEkgMdcItSWSEEqfMEAsAER  
Tco24 grTAQARVS-----smkSEdieMmcGVPQ-----gfmrrfptDDLTIicihatlpvIQET--tdegMdcItNWSEKhyMEVSVxR  
Tco157 grTS-----  
Tco81 grTAQARVS-----smkSEdieMmfGVPQ-----gfmrrfADDLTIicihatlpvIQET--tdegMdcItNWSEKhyMEVSVr-  
Tco5 grTAQVRVN-----rikSEdtqMTyaVpX-----gymrrfpADDLTIicthtllpkIQET--tEkgMdcItSWSEEqfMEAsAER  
Tco91 lwtvQVRVN-----nmk-EdieMSfGVPQ-----svlgsfpADDLTIicthtNireIKET--ldkgVdcItRWSEEHYMEVSAER  
Tco90 hr-AQVRVN-----smkSEdieMmcGVPQsGALGPLlllnavvSprKRLdeip---gfmrgfFANDLqMacthtNireIKET--ldkgVdcItRWSEEHYMEVSAER  
Tco108 grTAxVRIS-----sikSEdtqMTcGVpLGSVLGslLslIivvvSprKRLdeip---gfmrgfFANDLqMacthtNireIKET--tEkgMdcItNcSEEHYMEVSAER  
Tco13 grtVQVRVS-----sikSEgtqMTcGVpQsSVLGPL-lllnavvDLSLKRlDeiq---gMysfFADDLTIicmhaklleIQET--tEkgMdcItNWSAeqLMEVt-aK  
Tco49 grtVQVRVS-----sikSEgtqMTcGVpQsSVLGPL-lllnavvDLSLKRlDeiq---gMysfFADDLTIicmhaklleIQET--tEkgMdcItNWSAeqLMEVt-aK  
Tv00024 grRAvVtVN-----ntvLEyirLacGarcGwVLGP-LpfIivvvDspNmKLNcs---wLKNvFvDkLamVctgag--prVRRprglqrctfytWAVeCcmEvPaAK  
Tv03559 grAAKVRag-----salSEdtqITcGaPRGSLGSL-llfIvvg-----FFADgLaVvcagvc--fnVnr-----kwpcnltgWSaEIlvqSlaK  
Tv06690 ghaSQVRgNv-----ngalSgdidfTcGghhGepfGP-plyVvtADSLKRlNcVp---vPrRgfFADNLTIvctSageqnlXQtmgQtrdcfntlStacfvEallag  
Tv06040 ghaSQVRgNv-----ngalSgdidfTcGghhGepfGP-plyVvtADSLKRlNcVp---vPrRgfFADNLTIvctSageqnlXQtmgQtrdcfntlStacfvEallag  
Tv05146 -----  
TbII.34 grAAlVRIN-----ntlSnkiqITcGVpQGSVLGSL-llfIiamDLSLKRlNaiv---aIKHcfFAGDfTIVcsytDreaIRQt--lQtgLdcIaTWStghyMEVSAEK  
TbVIII.118a grAlVRIN-----ntlSKkiqITcGVtQvSVLTP-LpfIiamDLSLKRlNaiv---aIKHcfFAGDfTIVcsntDreaIRQt--lQtgLdcIaTWStghyMEVSAEK  
TbIX.145a grtAvVRik-----ntlSnktLTyGVlQGSVLGSL-llfIiamDLSLKRlNaiv---aIKHcfFADDLTIvxsntyreARhk--lQtgLdxItaSWXEHyMEfSAER  
TbIX.51 grtAvVRIN-----ntlSKkiqLkcsVPQvSLTP-llfIiamDLSLKRlNaiv---aIKHcfFAGDfTIVcsntDreaIRQt--lQtgLdcIaTWStghyMEVSAEK  
TbV.204a rrtAvalIN-----ntpskkiqITcGVvQGSVLWp-LlfiiaiefLSakLNaip---afQhclltdDLTIvssntDmeaIRxt--iQtgLdcIvSWSAeryMKVSAEK  
TbV.204b rrtAvalIN-----ntpskkiqITcGVvQGSVLWp-LlfiiaiefLSakLNaip---afQhclltdDLTIvssntDmeaIRxt--iQtgLdcIvSWSAeryMKVSAEK  
TbVIII.118b rwtAvaiIS-----ntlSKkiqITcVtEvSVLTP-LlfiismDf-SakrNaip---aLKHlffSDhTIVcsntDreaIRQt--lQtgLdcIaSWSAehyMGLSAEK  
TbIX.145c grtKVRIN-----nplKenilTcGVpQGSVLGSL-llfIiamDLSLKRlNaiv---gLPHgfFADDLTIvrsntDmeaIRxt--iQtgMycIvSWlGEHdcmVSAEK  
Tco78 ksmvaVRVN-----sklSEgtvLTCeVpQGSVL-llfIiitvSLSERLNrip---gLSYgfFADDLTIactnsNselmQa--lRkgLgcIqG-WSSEHYMKMSAER  
Tco137 ksmvaVRVN-----sklSEgtvLTCeVpQGSVL-llfIiitvSLSERLNrip---gLSYgfFADDLTIactnsNselmQa--lRkgLgcIqGxWSSEHYMKMSAER  
Tco57 tsmvaVRVN-----nklSEdmeLTCrVpQGSMLGllfIiitvSLSERLNrip---gLSYgfFADDLTIvctnsNselmQa--lQkgLdcIqGKSEHYVerhvgK  
Tco51 ksmvaVRVN-----nklSEdmeLTCrVpQGSVpPllIiiaivNSLVgLNrip---gLSYgfFADDLTIactnsNselmQa--lQkgLdcIqGxWSSEHYMKMSAER  
Tco80 rrtAEVRVS-----nmlSEgialSceaPQGYVLGSL-llfIiitvSLSERLNrip---gLPHgfFADDLTIvrsntDmeaIRxt--iQtgMycIvSWlGEHdcmVSAEK  
Tco1 hrGAKaaVrn-----twSgvisLayGVghGT-VsgspLlIatESLNQKLSNvt---gIRHsllAvDkIacisgEgkdhEsslqRgcaswr---lRghyMEAsAER  
Tco38 hrGAKaaVrn-----twSgvisLayGVghGT-VsgspLlIatESLNQKLSNvt---gIRHsllAvDkIacisgEgkdhEsslqRgcaswr---lRghyMEAsAER  
Tco83 hrEAQaaVrn-----twSgvisLayGVghGS-LflIhplLsatESLNQKLSNvt---gIRHsllAvDkIacisgEgkdhEsslqRgcaswr---lRghyMEAsAER  
Tco135 hrGAKaaVrn-----twSgvisLayGVghGT-VsgspLlIatESLNQKLSNvt---gIRHsllAvDkIacisgEgkdhEsslqRgcaswr---lRghyMEAsAER  
Tco112 hrGvLvpwpgtgggekrpvisLTSgVPhGSPflIhplllLsaESLNQKLSNvt---gIRHsllAvDkIacisgEgkdhEsslqRgcaswr---lRghyMEAsAER  
Tco84 syhesVaVgn-----twpgvmsLTSgVpQGT-VsgsLlIatESLNQKLSNvt---gIRHsllAvDkIacisgEgkdhEsslqRgcaswr---lRghyMEAsAER  
Tco105 syhesVaVgn-----twpgvmsLTSgVpQGT-VsgsLlIatESLNQKLSNvt---gIRHsllAvDkIacisgEgkdhEsslqRgcaswr---lRghyMEAsAER  
Tco79 lprvlsGvgn-----twpgvisLTSgVpQGT-VsgsLlIatESLNQKLSNvt---gIRHsllAvDkIacisgEgkdhEsslqRgcaswr---lRghyMEAsAER  
Tco8 hrRedKaaVrn-----twSrvtsLayGVpQGT-VsgsLlIatESLNQKLSNvt---gIRHsllAvDkIacisgEgkdhEsslqRgcaswr---lRghyMEAsAER  
Tco41 drdAKaaVrn-----isevaf-LTyGVpQGS-VpasLlIvaidShNQRlNrvt---gIRcspFAGDLrIscmngDkwvIEcflqhdcasqL---lRghyMEAsAER  
Tco97 drdAKaaVrn-----isevaf-LTyGVpQGS-VpasLlIvaidShNQRlNrvt---gIRcspFAGDLrIscmngDkwvIEcflqhdcasqL---lRghyMEAsAER  
Tco34 rsdAKaaVrn-----isevaf-LTyGVpQGS-VpasLlIvaidShNQRlNrvt---gIRcspFAGDLrIscmngDkwvIEcflqhdcasqL---lRghyMEAsAER  
Tco19 gcypVaaVrn-----trpvaisLTheMpsvf-flgtLlIatESLNQKLSNvt---gMRHsllSDgkIact-----  
Tco43 drEAKVtVrn-----twSgvmpLayGVpQGT-cfwlTlLlIamDShNQRlNrvt---gIRHsllvDdLkIciggdKkdlEgllrsdcasqr---lRghyMEAsAER  
Tco149 drEAKVtVrn-----twSgvmpLayGVpQGT-cfwlTlLlIamDShNQRlNrvt---gIRHsllvDdLkIciggdKkdlEgllrsdcasqr---lRghyMEAsAER  
Tbinqi nrtgRVRfke-----klSrsrtferGVpQGTALGPiMfiivm-LSLQRlaevp---lQHGfFADDLTIlarhtErdrvInht--lQcglNvalqWSKSEYfMsvNVaK  
TbIX.146b nrtgRVRfke-----klSrsrtferGVpQGTALGPiMfiivm-LSLQRlaevp---lQHGfFADDLTIlarhtErdrvInht--lQcglNvalqWSKSEYfMsvNVaK  
Tco7229 -----  
Tc510783 gtsAvVRIDk-----laSfpntsvrGaPQGTVLGPIcIsIamN-SLcscLSnap---sICHgLIADDPThItqhsNrdtInsa-pQkgLsaVverTKryfIKaNaGk  
Tc510783 stsAvVcIDk-----ptpsprtLrGaPQGVlPaIffvVmr-SrcpSnpv---lLRrgfIADDLTlttqqsNrdainSa-sKEgLSaVaewTReYfVaaNArK  
Tc511541 ntsAvVcIDk-----ltpsrtLrGaPQGTvPpIffvVmr-SrcpSnpv---lLRrgfVADALtTtaqqsDrdaInsa-pQkgLsaVverTKryfIKaNaGk  
TbI.1 grKkQVRVkk-----vSgnrefTrGVpQGTVLGPI-llIivvN-SLSKRLNqip---gLGHyfFADDLTIscrhSdrniVQET--lQagLnaVaAWSErTgMvInVDK  
Lm11a drPAcARfht-----ekSrtfTrGaVGSVAvg-LpfiivvDlLrveLSKtp---gLRhYfAEDIEVltpssDKfaIQatagslewstpcsx--vpp  
Lm30a drRAcVgfrt-----rSKmaefacGaPQGSVAvg-LpfiivvDlLrveLSKtp---gLRhYfAEDIEVltpssDKfaIQatagslewstpcsx--vpp  
Lm19c crGAacafrr-----rKAKmarLpcGVpQGSarGP-srImvVDrLSagriktp---gLRraFADDLLaLltsstakdvRtlrtaarsr-aehtWREqLVELSAPR  
Lm33b drRAcARfht-----mrStmarLTCrVaQpSVLGP-LrIimvVDrLSagriktp---aeHhAFADDLLaLltsstakdvRtlrtaarsr-aehtWREqLVELSAPR  
Lm35d rlsAcVRLEg-----krpEmqrFtrGVsQecVrGP--ffpplvNSLdvglgktr---eLhYafcADEVALltpssGenaMhvtlrfalwr-agrrlRkrfMvLSAhs  
Lbr6a sgctcarfHg-----kg-rwpsLhaGLHqAVLGP-rflIivvDlLrveLSKtp---wLQHGfFADDLTlptLtsaadevksatlpqalrk-aaycAvhEQSpStp  
Lbr11a grRAcARfht-----rKsmntrgacGaPRKSVLGP--fviavDLSLcveLSeAr---gLRhYfAEDIEVltpssDKfaIQatagslewstpcsx--vpp  
Lbr11b grRAcARfht-----rKsmntrgacGaPRKSVLGP--fviavDLSLcveLSeAr---gLRhYfAEDIEVltpssDKfaIQatagslewstpcsx--vpp  
Lbr11c grRAcARfht-----rKsmntrgacGaPRKSVLGP--fviavDLSLcveLSeAr---gLRhYfAEDIEVltpssDKfaIQatagslewstpcsx--vpp  
Lbr23c rrsRARVraht-----akSrsghayr-VLQGSVLGP--llfIiavNlSveLknpv---rLyHaIFSDNLTFIlsrstEedvIgmtprftlwq--xgvAhsglehhNAe  
Lm20a ggsScrpVp-----sls-hglLTYGpQGSVLGP--pllfilvDlLgavQwsg-----glacedtslirgteQgrlrmprn---aSSraagprKrr  
Lm29a grRAcARfht-----rKSEtarLrcGaPgrparP-pspppwargrtgrtrtp---raapsfagDatthpapsdkcphrlnmrrn---gAgRaphpngnAht  
LITc grYAKVRVgh-----rHSDrrpMLrGVpQGSVLGPylfLslyvhplLNlNs-fa---gYtadmYADDLTIvksgrredaip--anmvLgkLhAWSQENgLaINpsK  
Tb11Tco dRlARnRVgn-----rKsaqrPvLrGVpQGSVVGGLfLslyvhplLNlNs-fa---gYtadmYADDLTIvksgrredaip--anmvLgkLhAWSQENgLaINpsK  
Tco110 ghfARTiVrn-----srSsqcrVhxGpPQdSLacqdflyyvdpflNslNs-sa---rVsdavYADDFfttikgrsx-estpk-vnkiLkqLhkcAsKsdsKMNpln  
Tco116 ghfARTiVrn-----srSsqcrVhrLrPQGLayqdflyyvdpflNslNs-sa---rVsdavYADDFfttikgrsx-estpk-vnkiLkqLhkcAsKsdsKMNpln  
Lbr23a hRyAQaKlgn-----plgKqyaLk-awPQGAVALPaqpslqatplpellVxfrp---daQfGmYADDLTIilcrgnrsdvri--gnavLgkVeaRskDsgmINpQK  
Lbr27i hRyAQaKlgn-----xLSkhyALkrwvPQGAVALPaqpslqatplpellVxfrp---daQfGmYADDLTIilcrgnrsdvri--gnavLgkVeaRskDsgmINpQK  
Lbr8a yRyAQaKlgn-----rLSkqygLmayehQGAVALPaqpslqatplpellVxfrp---daQfGmYADDLTIilcrgnrsdvri--gnavLgkVeaRskDsgmINpQK  
Lbr10a hRyAQaKlgn-----rLSkqygLkewwPQGTVALPaqpslqatplpellVxfrp---daQfGmYADDLTIilcrgnrsdvri--gnavLgkVeaRskDsgmINpQK  
Lbr14a hRyAQaKlgn-----rLSkqygLmaGVPQGAVALPaqpslqatplpellVxfrp---daQfGmYADDLTIilcrgnrsdvri--gnavLgkVeaRskDsgmINpQK  
Lbr23c hRyAQaKlgn-----plgQyqLmglwPQGTVALPaqpslqatplpellVxfrp---daQfGmYADDLTIilcrgnrsdvri--gnavLgkVeaRskDsgmINpQK  
Lbr3a hRyAQaKlgn-----plgQyqLkewwPQGAVALPaqpslqatplpellVxfrp---daQfGmYADDLTIilcrgnrsdvri--gnavLgkVeaRskDsgmINpQK  
Lbr33b yRyAQaKlgn-----rLSkqcaLmsGalQcAVLAPxpfslqatplpellVxfrp---daQfGmYADDLTIilcrgnrsdvri--gnavLgkVeaRskDsgmINpQK  
Lbr5a hRyAQaKlgn-----rLSkqygLmayehQGTVALPaqpslqatplpellVxfrp---daQfGmYADDLTIilcrgnrsdvri--gnavLgkVeaRskDsgmINpQK  
Lbr13b hRyAQaKlgn-----plgKqyaLkaGwPQGAVALPaqpslqatplpellVxfrp---daQfGmYADDLTIilcrgnrsdvri--gnavLgkVeaRskDsgmINpQK  
Lbr22d hRyAQaKlgn-----plgKqyaLkaGwPQGAVALPaqpslqatplpellVxfrp---daQfGmYADDLTIilcrgnrsdvri--gnavLgkVeaRskDsgmINpQK  
Lbr35d hRyAQaKlgn-----plgKqyaLmaGVPQGAVALPaqpslqatplpellVxfrp---daQfGmYADDLTIilcrgnrsdvri--gnavLgkVeaRskDsgmINpQK  
Lbr31g hRyAQaKlgn-----plvKqygLmaGVPQGAVALPaqpslqatplpellVxfrp---daQfGmYADDLTIilcrgnrsdvri--gnavLgkVeaRskDsgmINpQK  
Lbr19g hRyAQaKlgn-----lqKqyaLkTgGPKapfLhnh--hpsaslyseelpvxfp---daQfGmYADDLTIilcrgnrsdvri--gnavLgkVeaRskDsgmINpQK  
Tc511099 grYvRVctre-----qhSrkqlaSaGaPQGVpGqLflfvcvdlLrLrgSisy---aaaf-mYADEhTLVascaDihacaaa--mRplLsVvTAAaHsLkINvaK  
Tc510933 grYvRVctre-----qhSrkqlaSaGaPQGVpGqLflfvcvdlLrLrgSisy---aaaf-mYADEhTLVascaDihacaaa--mRplLsVvTAAaHsLkINvaK  
Tc511603a grYvRVctre-----ghfrkqltSaGLLQGSVpGqLflfvcvdlLrLrmDnSisy---aaaf-mhADDLTLVascaDihacaaa--mRpvfLsVvTAAaHsLkINvaK  
Tc506939 grYvRVctre-----phSrkqlaSaVpQGVpGqLflfvcvdlLrLrgSisy---aaaf-mYADEhTLVascaDihacaaa--mRplLsVvTAAaHsLkINvaK  
Tc507065a gilvlpnre-----hAaqrvtlDsln-----hslgkvkexft---asaf-qYcR-Deht-ThVnsgshlrvL  
Tc507069 wlrfgVcsp-----tmsLtaarlrsrgpsmsfLGPqLlhrvdglLgRlySvhf---asaf-ihADgrTLValyDirvraa--mptvflsVvTAAaHsLkINvaK  
Tc503849a wlrfgVcsp-----tmsLtaarlrsrgpsmsfLGPqLlhrvdglLgRlySvhf---asaf-ihADgrTLValyDirvraa--mptvflsVvTAAaHsLkINvaK  
Tc510693 ggrvrVsarr-----eySxqrLaSavaaQcSfLGPqLlhrvdglLgRlySvhf---asaf-ihADgrTLValyDirvraa--mptvflsVvTAAaHsLkINvaK  
Tc508139 ggcAwVsarr-----qySrqlppavaaQcSfLGPqLlhrvdglLgRlySvhf---asaf-ihADgrTLValyDirvraa--mptvflsVvTAAaHsLkINvaK  
Tc506309 sgcvvVsarr-----eySrghlTavaaQcSfLGPqLlhrvdglLgRlySvhf---asaf-ihADgrTLValyDirvraa--mptvflsVvTAAaHsLkINvaK  
Tc510213 aaacRVsarr-----eySrghlTavaaQcSfLGPqLlhrvdglLgRlySvhf---asaf-ihADgrTLValyDirvraa--mptvflsVvTAAaHsLkINvaK  
Consensus XRXAQVRVXXXXXXXXXXSEXXXLTXGVPQGSVLGPIlLXXIXXDSLKRlNXXX---XlQHXfFADDLTIvxxxXxxxXlQXXXXQXXLXXIXSWSEKXXMEVSAEK
